# Supplementary material
Source: PubMed Central journal article supplement (PMC6728563)
Supplement: DS_10.1177_0022034512473482.pdf [file DS_10.1177_0022034512473482.pdf]

J. Zhang<sup>1#</sup>, K. Jiao<sup>1#</sup>, M. Zhang<sup>1</sup>, T. Zhou<sup>2</sup>, X.-D. Liu<sup>1</sup>, S.-B. Yu<sup>1</sup>, L. Lu<sup>1</sup>, L. Jing<sup>1</sup>, T. Yang<sup>1</sup>, Y. Zhang<sup>1</sup>, D. Chen<sup>3</sup>, and M.-Q. Wang<sup>1\*</sup>

<sup>1</sup>Department of Oral Anatomy and Physiology and TMD, School of Stomatology, Fourth Military Medical University, 145 Changlexi Road, Xi'an, 710032, China; <sup>2</sup>Equipment Center, School of Stomatology, Fourth Military Medical University, China; and <sup>3</sup>Department of Biochemistry, Rush University Medical Center, Chicago, IL, USA; #authors contributing equally to this work; \*corresponding author, mqwang@fmmu.edu.cn

*J Dent Res* DOI: 10.1177/0022034512473482

# Occlusal Effects on Longitudinal Bone Alterations of the Temporomandibular Joint

## APPENDIX

**Appendix Table 1.** Grouping of Rats

| Time Point | Micro-CT Scan |     | Staining Analysis<br>(TMJ on right side) |                | Real-time PCR Analysis<br>(TMJ on left side) |                |
|------------|---------------|-----|------------------------------------------|----------------|----------------------------------------------|----------------|
|            | Control       | EXP | Control                                  | EXP            | Control                                      | EXP            |
| 12w        | 8*            | 8*  | 9                                        | 9              | 9                                            | 9              |
| 32w        |               |     | 9 <sup>#</sup>                           | 9 <sup>#</sup> | 9 <sup>#</sup>                               | 9 <sup>#</sup> |

\* Rats for micro-CT scanning were sacrificed at the end of 32 wks. The TMJ tissues on the right side were utilized for HE and TRAP staining and immunohistochemical (IHC) analysis, and the TMJ tissues on the right side were used for real-time PCR test.

# Eight of 9 of these samples were from those examined by micro-CT.

**Appendix Table 2.** Abbreviations

|       |                                               |
|-------|-----------------------------------------------|
| ALP   | alkaline phosphatase                          |
| BMD   | bone mineral density                          |
| BS/BV | the ratio of bone surface area to bone volume |
| BV/TV | the ratio of bone volume to tissue volume     |
| Col1  | type I collagen                               |
| DMP-1 | dentin matrix protein-1                       |
| EXP   | Experimental (group)                          |
| HE    | hematoxylin and eosin (staining)              |
| IHC   | immunohistochemistry (staining)               |
| OA    | osteoarthritis                                |
| OPG   | osteoprotegerin                               |
| RANKL | nuclear factor-kappa B ligand                 |
| ROI   | region of interest                            |
| Tb.N  | trabecular number                             |
| Tb.Sp | trabecular separation                         |
| Tb.Th | trabecular thickness                          |
| TMD   | temporomandibular disorder                    |
| TMJ   | temporomandibular joint                       |
| TRAP  | tartrate-resistant acid phosphatase           |
| VEGF  | vascular endothelial growth factor            |

**Appendix Table 3.** Real-time PCR Primers Used in the Experiments

|                    | Forward                  | Reverse                   |
|--------------------|--------------------------|---------------------------|
| <i>ALP</i>         | CACGTTGACTGTGGTTACTGCTGA | CCTTGTAAACCAGGCCCGTTG     |
| <i>cathepsin K</i> | CGGCTATATGACCACTGCCTTC   | TTTGCCGTGGCGTTATACATACA   |
| <i>Col1 a1</i>     | CCAGCAAAGGCAATGCTGAA     | TTGTTGCAGAGGCCATGGAG      |
| <i>Col1 a2</i>     | CCTGGGACTCCTGGACTT       | GGACCAGCAGACCCAATG        |
| <i>DMP-1</i>       | GAAGACTGTTATCCTCCTTACG   | GTGATCCCCTTAGATTCTCC      |
| <i>GAPDH</i>       | GGCACAGTCAAGGCTGAGAATG   | ATGGTGGTGAAGACGCCAGTA     |
| <i>OPG</i>         | CTCATCAGTTGGTGGGAATGAAGA | ACCTGGCAGCTTTGCACAATTA    |
| <i>osteocalcin</i> | AAGGTGGTGAATAGACTCCG     | AAACGGTGGTGCCATAGATG      |
| <i>RANKL</i>       | GCAGCATCGCTCTGTTCTGTGTA  | GCATGAGTCAGGTAGTGCTTCTGTG |
| <i>TRAP</i>        | GTGCATGACGCCAATGACAAG    | TTCCAGCCAGCACGTACCA       |
| <i>VEGF</i>        | GCCTCAGGACATGGCACTAT     | GGAGGAGGAGGAGCCATTAC      |
